# Supplementary material
Source: PubMed Central journal article supplement (PMC4715774)
Supplement: NIHMS734982-supplement-Supp_MaterialS1.pdf [file NIHMS734982-supplement-Supp_MaterialS1.pdf]

## Supplemental Material

### Rosetta command lines

Design runs used Rosetta3 version 47627M with the following command lines:

Command line 1:

```
fixbb.macosgccrelease \  
-database rosetta_database \  
-multi_cool_annealer 10 \  
-resfile resfile \  
-correct \  
-linmem_ig 10 \  
-nstruct 20 \  
-s 3GBS_strip.pdb
```

Command line 2:

```
fixbb.macosgccrelease \  
-database rosetta_database \  
-multi_cool_annealer 10 \  
-resfile resfile \  
-linmem_ig 10 \  
-nstruct 10 \  
-score:weights design_hpatch.wts \  
-s 3GBS_strip.pdb
```

Command line 3:

```
fixbb.macosgccrelease \  
-database rosetta_database \  
-multi_cool_annealer 10 \  
-resfile resfile \  
-linmem_ig 10 \  
-nstruct 20 \  
-score:weights design_hpatch.wts \  
-soft_rep_design \  
-s 3GBS_strip.pdb
```

All three runs used the following resfile:

```
PIKAA GPAVLIMFYWKRQNEDST  
EX 1 LEVEL 4 EX 2  
USE_INPUT_SC  
start  
#disulfide  
37 A NATRO  
113 A NATRO  
#disulfide
```

```
63 A NATRO
76 A NATRO
#disulfide
177 A NATRO
184 A NATRO
#triad
181 A NATRO
194 A NATRO
126 A NATRO
#other active site res
90 A NATRO
#args
162 A NATAA
82 A NATAA
65 A NATAA
#pro
36 A NATRO
39 A NATRO
51 A NATRO
60 A NATRO
81 A NATRO
88 A NATRO
93 A NATRO
116 A NATRO
169 A NATRO
192 A NATRO
193 A NATRO
```

The job with 3<sup>rd</sup> command line listed above was aborted after 2 structures were generated, giving 32 total predictions. Command lines 2 and 3 made use of the 'hpatch' mode to avoid large hydrophobic surface patches (R. Jacak, A. Leaver-Fay, and B. Kuhlman (2012) *Proteins* 280 825–838).

Mutations for variant 11 were generated with the following command line and resfiles:

```
fixbb.macosgccrelease \  
-database rosetta_database/ \  
-multi_cool_annealer 10 \  
-resfile resfile \  
-correct \  
-linmem_ig 10 \  
-nstruct 20 \  
-s 3GBS_strip.pdb
```

resfile:

```
NATAA  
EX 1 LEVEL 4 EX 2 EX 3  
USE_INPUT_SC  
start
```

#disulfide

37 A NATRO

113 A NATRO

#disulfide

63 A NATRO

76 A NATRO

#disulfide

177 A NATRO

184 A NATRO

#triad

181 A NATRO

194 A NATRO

126 A NATRO

#other active site

90 A NATRO

#pro

36 A NATRO

39 A NATRO

51 A NATRO

60 A NATRO

81 A NATRO

88 A NATRO

93 A NATRO

116 A NATRO

169 A NATRO

192 A NATRO

193 A NATRO

# design

102 A PIKAA D

105 A PIKAA R

106 A PIKAA E

# new

97 A PIKAA GPAVLIMFYWKRQNEDST

98 A PIKAA GPAVLIMFYWKRQNEDST

99 A PIKAA GPAVLIMFYWKRQNEDST

101 A PIKAA GPAVLIMFYWKRQNEDST

107 A PIKAA GPAVLIMFYWKRQNEDST

109 A PIKAA GPAVLIMFYWKRQNEDST

110 A PIKAA GPAVLIMFYWKRQNEDST

135 A PIKAA GPAVLIMFYWKRQNEDST

139 A PIKAA GPAVLIMFYWKRQNEDST

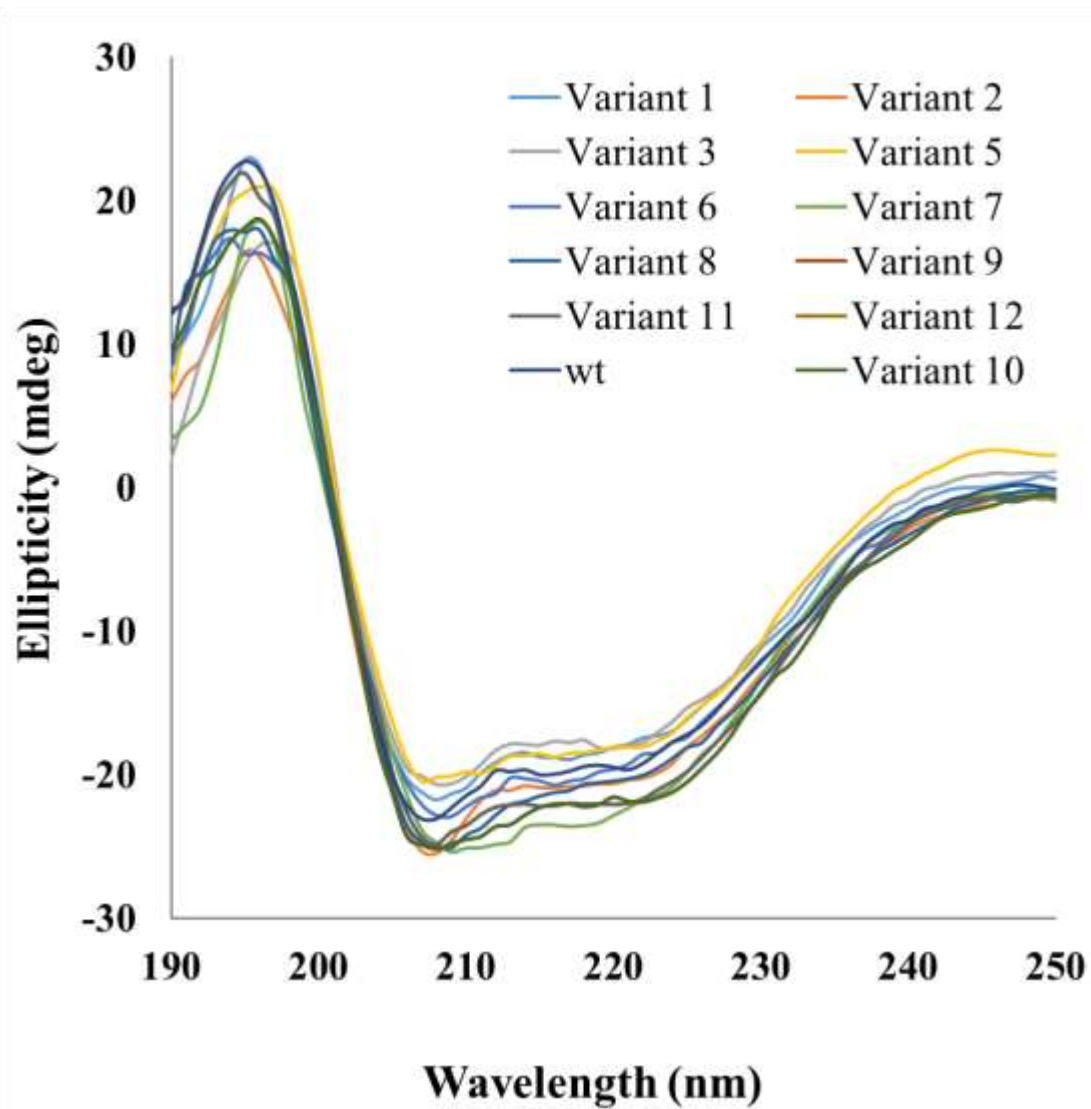

**Figure S1:** CD wavelength scan overlays to compare the secondary structures of variants in comparison with Wt-AoC. Analysis was performed on 10 $\mu$ M protein solutions in 20mM pH 8 Phosphate buffer at room temperature.

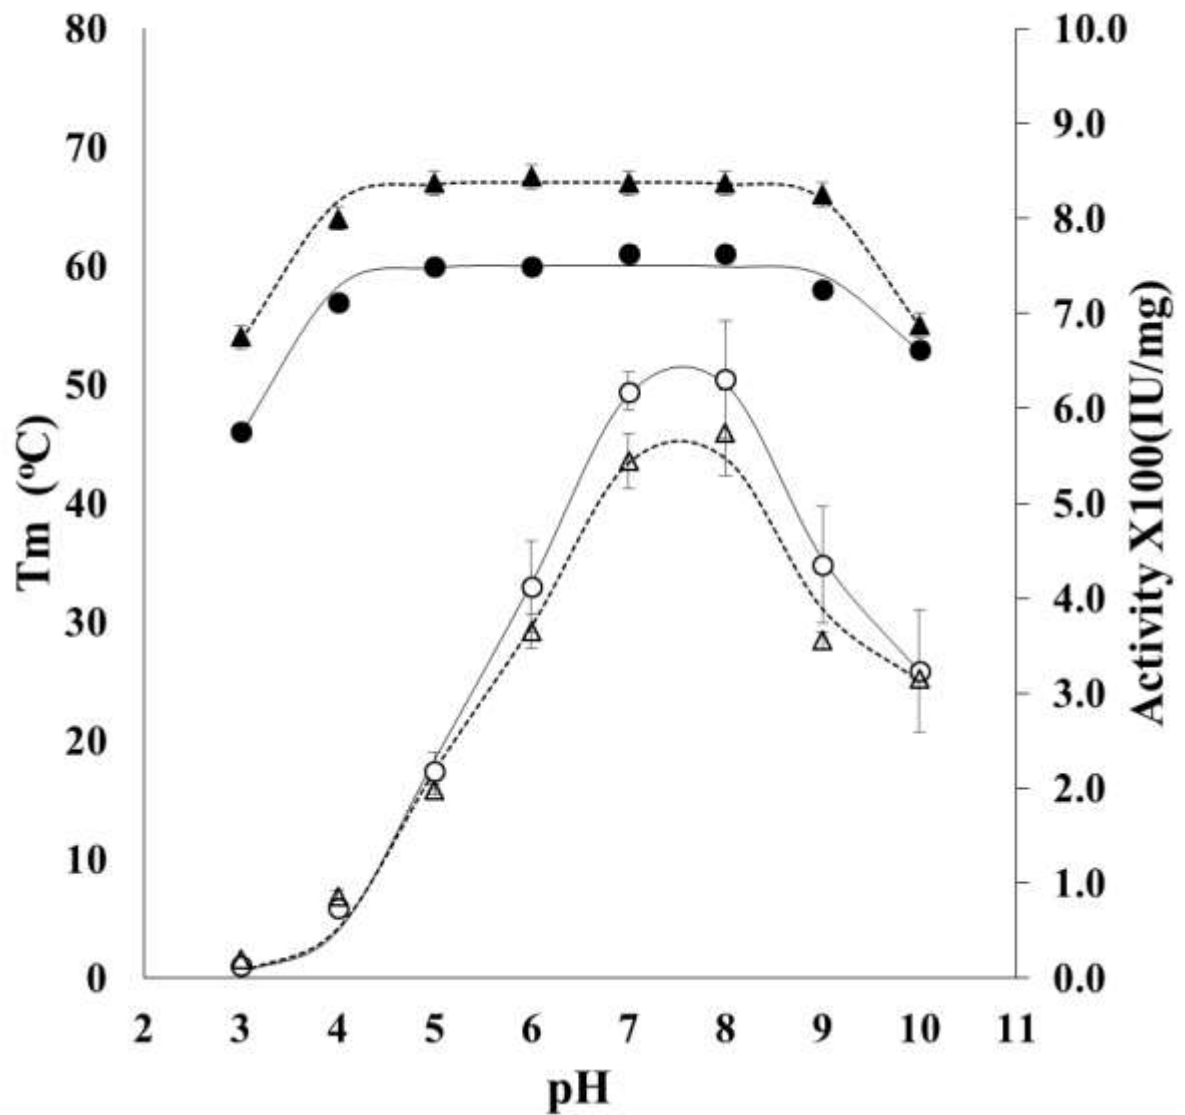

**Figure S2** - Comparison of pH optima for the activity and stability of Variant 3 and wt-AoC (circles, wt-AoC; triangles - Variant 3; filled symbols -  $T_m$ ; open symbols, PCL hydrolysis activity). The lines are fits to the Henderson-Hasselbalch equation for two ionizable groups ( $T_m$  data) and at least four ionizable groups (activity data). Variant 4 and wt-AoC have equivalent pKa values.
